# Supplementary material for: Developmental Pathways Pervade Stem Cell Responses to Evolving Extracellular Matrices of 3D Bioprinted Microenvironments
Source: Stem Cells Int. 2018 Mar 29;2018:4809673. doi: 10.1155/2018/4809673 (PMC5896227; doi:10.1155/2018/4809673)
Supplement: Supplementary 1 — Supplemental Table 1: contains raw data related to the tracking of physical structure modification. [file 4809673.f1.xlsx]

## Sheet: Physical Size
Time	3D Environment Area Modifications
	3D/BSA	3D/BSA	3D/BSA	3D/FN	3D/FN	3D/FN	3D/COL1	3D/COL1	3D/COL1	3D/LN	3D/LN	3D/LN
Day 0	1	1	1	1	1	1	1	1	1	1	1	1
Day 1	0.98	1.07	1.06	1.01	1.05	1.02	0.94	0.95	1.03	0.94	0.98	0.94
Day 2	0.98	1.1	1.07	0.97	1.04	1.08	0.94	0.94	1.06	0.94	0.95	0.95
Day 3	1.01	1.09	1.07	0.97	0.96	1.05	0.98	0.97	1.1	0.92	0.98	0.94
Day 4	0.95	1	1.04	0.85	0.95	0.94	0.9	0.97	1.12	0.91	0.98	0.96
Day 5	1	1.03	0.99	0.56	0.74	0.84	0.98	0.92	1.08	0.91	0.96	0.97
Day 6	0.98	0.95	0.98	0.51	0.6	0.77	0.99	0.87	1.02	0.93	0.93	0.96
Day 7	0.92	0.96	0.96	0.45	0.63	0.71	0.98	0.85	1.03	0.91	1	0.92
Day 8	0.91	1.02	0.94	0.42	0.59	0.64	0.95	0.8	0.96	0.89	0.96	0.98
Day 9	0.88	0.91	0.71	0.37	0.56	0.6	0.93	0.74	1.01	0.85	0.97	0.95
Day 10	0.98	0.75	0.55	0.44	0.49	0.6	0	0.73	0.97	0.82	0.9	0.85
Day 11	0.9	0.67	0.45	0.44	0.42	0.59	0	0	1.05	0.76	0.76	0.74
Day 12	0.8	0.64	0.42	0.4	0.48	0.66	0	0	0.68	0.71	0.68	0.59
Day 13	0.76	0.71	0.41	0.34	0.38	0.67	0	0	0	0.68	0.61	0.56
Day 14	0.88	0.58	0.21	0.3	0.42	0.49	0	0	0	0.62	0.55	0.56
